# Supplementary material for: Sugarcane/peanut intercropping system improves physicochemical properties by changing N and P cycling and organic matter turnover in root zone soil
Source: PeerJ. 2021 Feb 16;9:e10880. doi: 10.7717/peerj.10880 (PMC7894120; doi:10.7717/peerj.10880)
Supplement: Data S1 [file peerj-09-10880-s001.xlsx]

## Sheet: Sheet1
treatments	available nitrogen	available phosphorus	available potassium	total nitrogen	total phosphorus	total potassium	organic matter	pH value	water content	catalase	urease	sucrase	acid phosphatase	protease	microbial biomass carbon	microbial biomass nitrogen	microbial biomass phosphorus	bacteria	fungi	actinomycetes
S1	95.2	92.9405	138	0.72758	0.771785	6.75	16.3849	6.88	0.12	42.6998	1.056	0.414923	2.1888	41.1971	493.97	44.205	8.78155	10	3	23
S1	90.3	89.9405	137	0.74186	0.775785	5.25	15.9298	6.92	0.123333	43.4367	1.122	0.421655	2.052	39.3441	491.832	47.705	8.4006	11	4	21
S1	93.1	91.9405	131	0.65842	1.03779	6.5	16.84	6.91	0.106667	43.8282	1.116	0.426143	2.0862	41.1971	483.278	44.205	8.65655	10	5	16
S2	88.9	116.44	124	0.82558	0.611785	7.75	16.1573	7.02	0.14	32.5125	1.116	0.394727	2.2743	35.0206	449.064	58.205	11.6208	13	3	21
S2	85.4	114.94	123	0.79786	0.613785	7.5	15.7022	7.01	0.146667	30.8401	1.14	0.395849	2.2572	34.0941	440.51	58.205	11.4542	13	3	18
S2	84	116.94	129	0.89642	1.03779	7.25	16.84	7	0.156667	32.2715	1.158	0.394727	2.2914	44.9029	446.926	54.705	11.6744	12	3	23
S3	98	107.44	118	0.79758	0.521785	10.75	24.5773	7.14	0.106667	33.1628	1.134	0.377896	2.394	33.7853	410.573	51.205	10.5435	19	4	18
S3	102.9	104.94	116	0.86786	0.529785	10.25	23.2119	7.11	0.1	34.5322	1.164	0.38014	2.4453	32.55	427.68	54.705	10.222	18	4	16
S3	98.7	106.44	113	0.81242	0.607785	11.5	26.1703	7.09	0.12	34.8881	1.128	0.375652	2.5137	34.4029	416.988	54.705	10.4006	19	4	16
S4	112	151.94	124	1.02158	0.431785	7	25.7152	6.93	0.14	30.9952	0.888	0.373408	2.565	30.6971	466.171	51.205	15.9185	11	9	19
S4	110.6	151.44	128	1.03586	0.447785	7.25	25.7152	6.91	0.146667	31.7088	0.9	0.375652	2.5479	29.7706	468.31	54.705	15.8411	11	9	19
S4	112	150.94	124	1.03642	0.525785	7.5	25.26	6.94	0.146667	32.7076	0.924	0.38014	2.6676	32.55	461.894	54.705	15.7994	11	9	19
